# Supplementary material
Source: publisher figshare collection journal article supplement (https://acs.figshare.com/ndownloader/files/5670486)

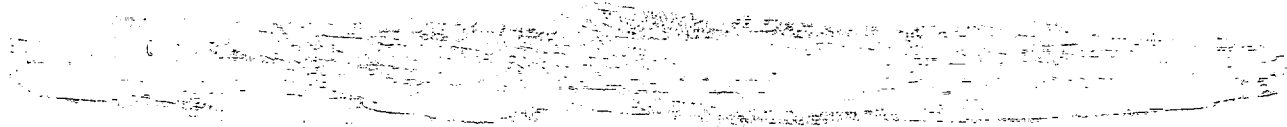

Figure 1S. Binding curve determined from the  $\Delta\delta_{\text{total}}$  of 2D  $\{^1\text{H}, ^{15}\text{N}\}$ -HSQC NMR spectral changes of E41A-sNTnC•2Ca<sup>2+</sup> upon addition of sTnI<sub>115-131</sub>. The curve is an average of 82 residues, which exclude Ser<sup>15</sup>, Asp<sup>30</sup>, Asp<sup>36</sup>, Val<sup>65</sup>, and Glu<sup>76</sup> due to spectral overlap, Pro<sup>53</sup> due to the lack of an amide hydrogen resonance, Ala<sup>1</sup> and Ser<sup>2</sup> presumably due to rapid exchange with solvent, and residues involved in site I. The determined dissociation constant was  $300 \pm 100$   $\mu\text{M}$ .

Figure 2S. (A) Contour plot of 2D  $\{^1\text{H}, ^{15}\text{N}\}$ -HSQC NMR spectra of apo E41A-sNTnC showing the effect of sTnI<sub>115-131</sub> addition. The apo E41A-sNTnC spectrum before the addition of peptide is shown with multiple contours while each addition of sTnI<sub>115-131</sub> are indicated by a single contour. (B) 1D-trace of Gly<sup>43</sup> throughout the titration of sTnI<sub>115-131</sub>, showing the progressive line broadening effect.

Figure 3S. The total change in chemical shift ( $\Delta\delta_{\text{total}}$  in Hz) for each backbone amide pair in E41A-sNTnC (A,D), cNTnC (B,E) and sNTnC (C,F) upon addition of calcium (A-C), or TnI peptide (D-F). The thin dashed lines indicate one standard deviation above the average.

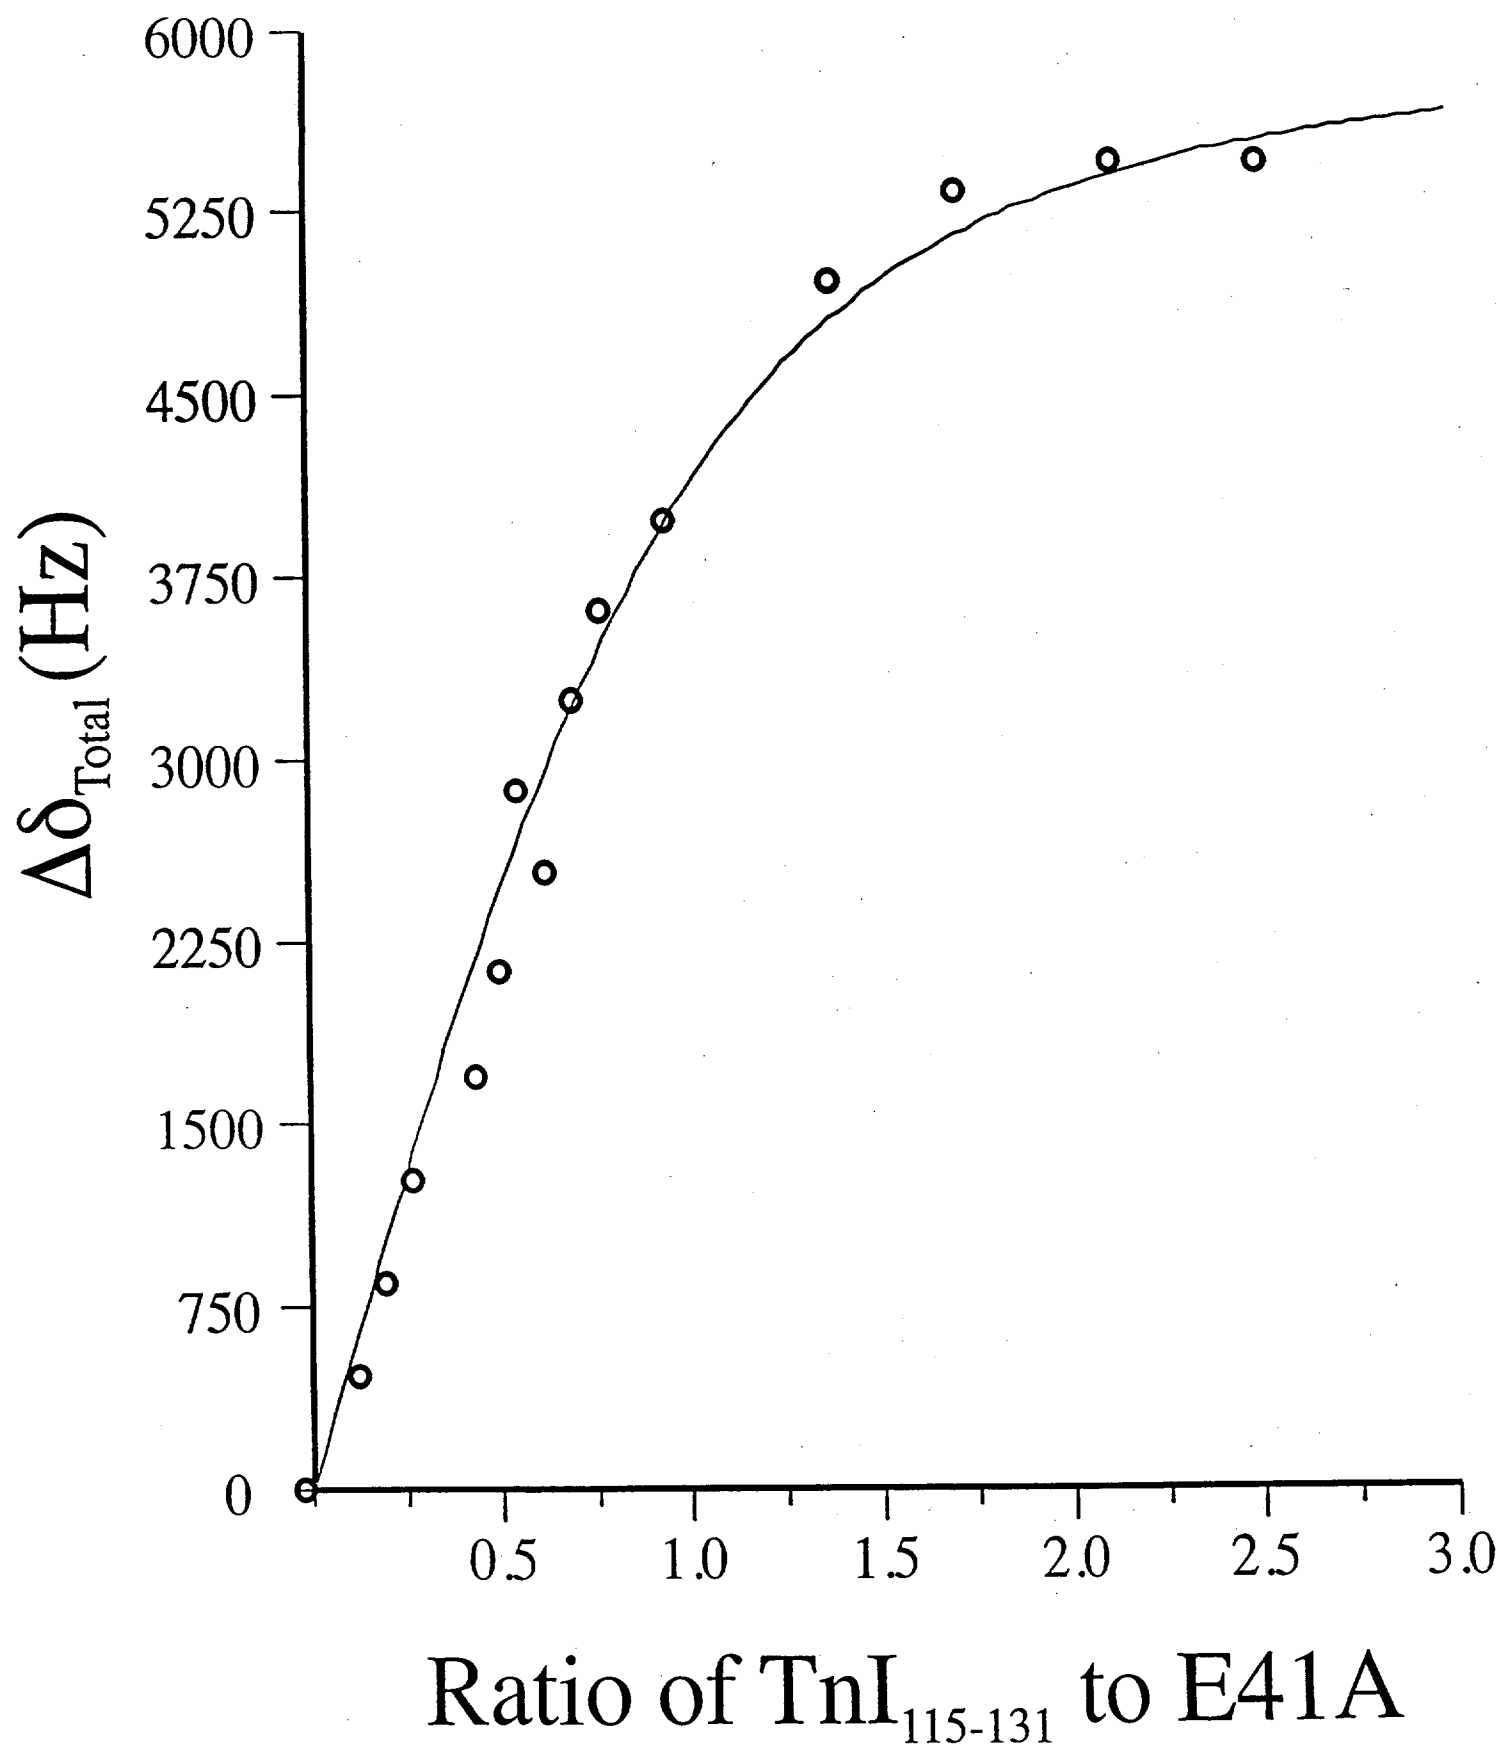

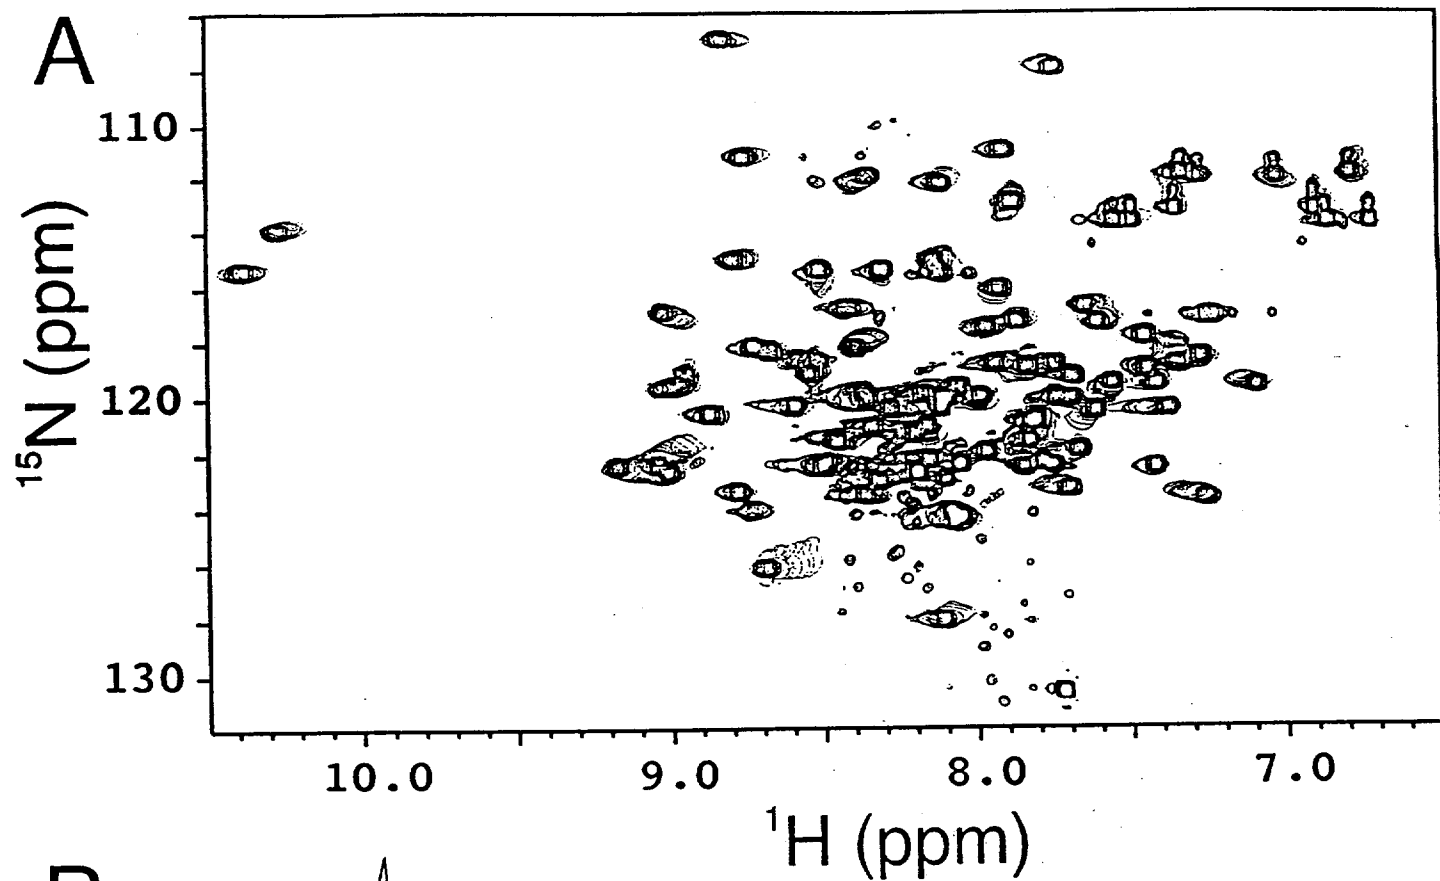

**B**

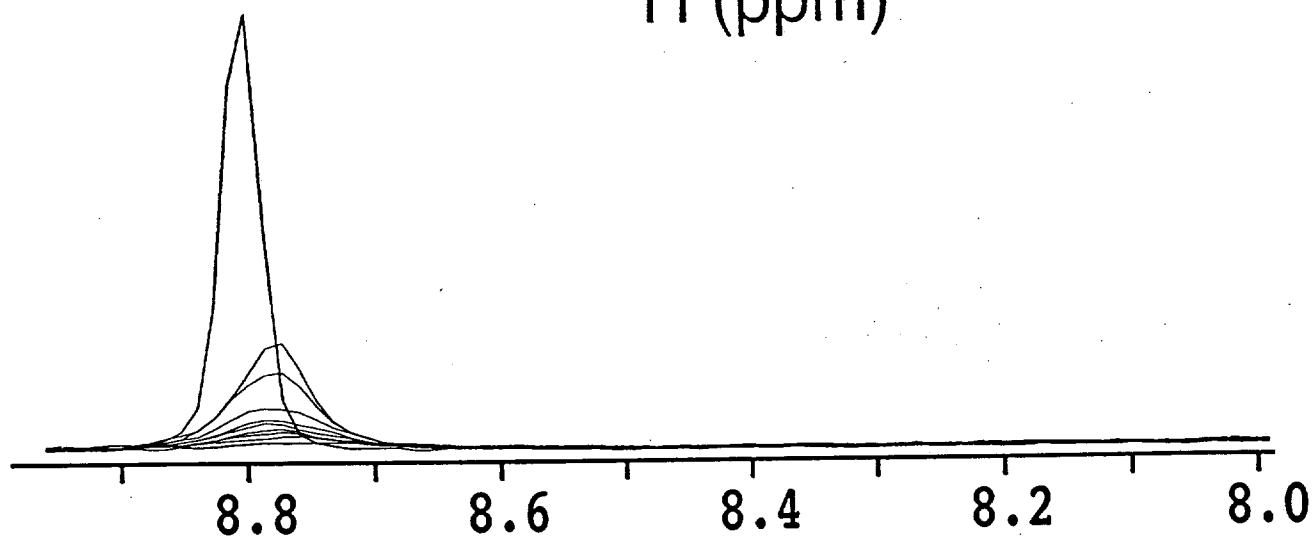

**C**

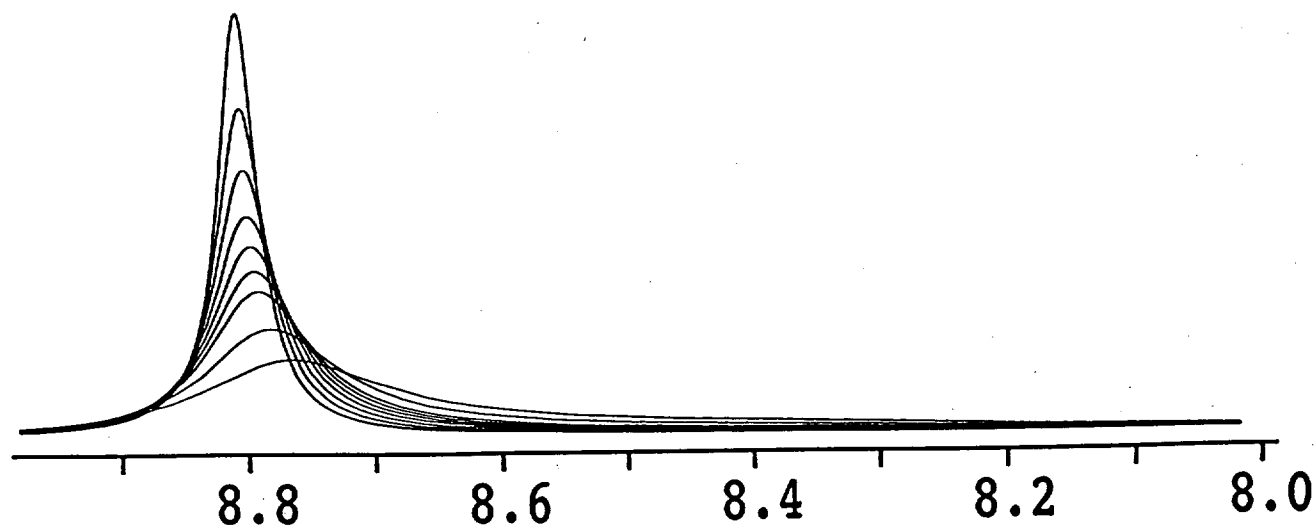

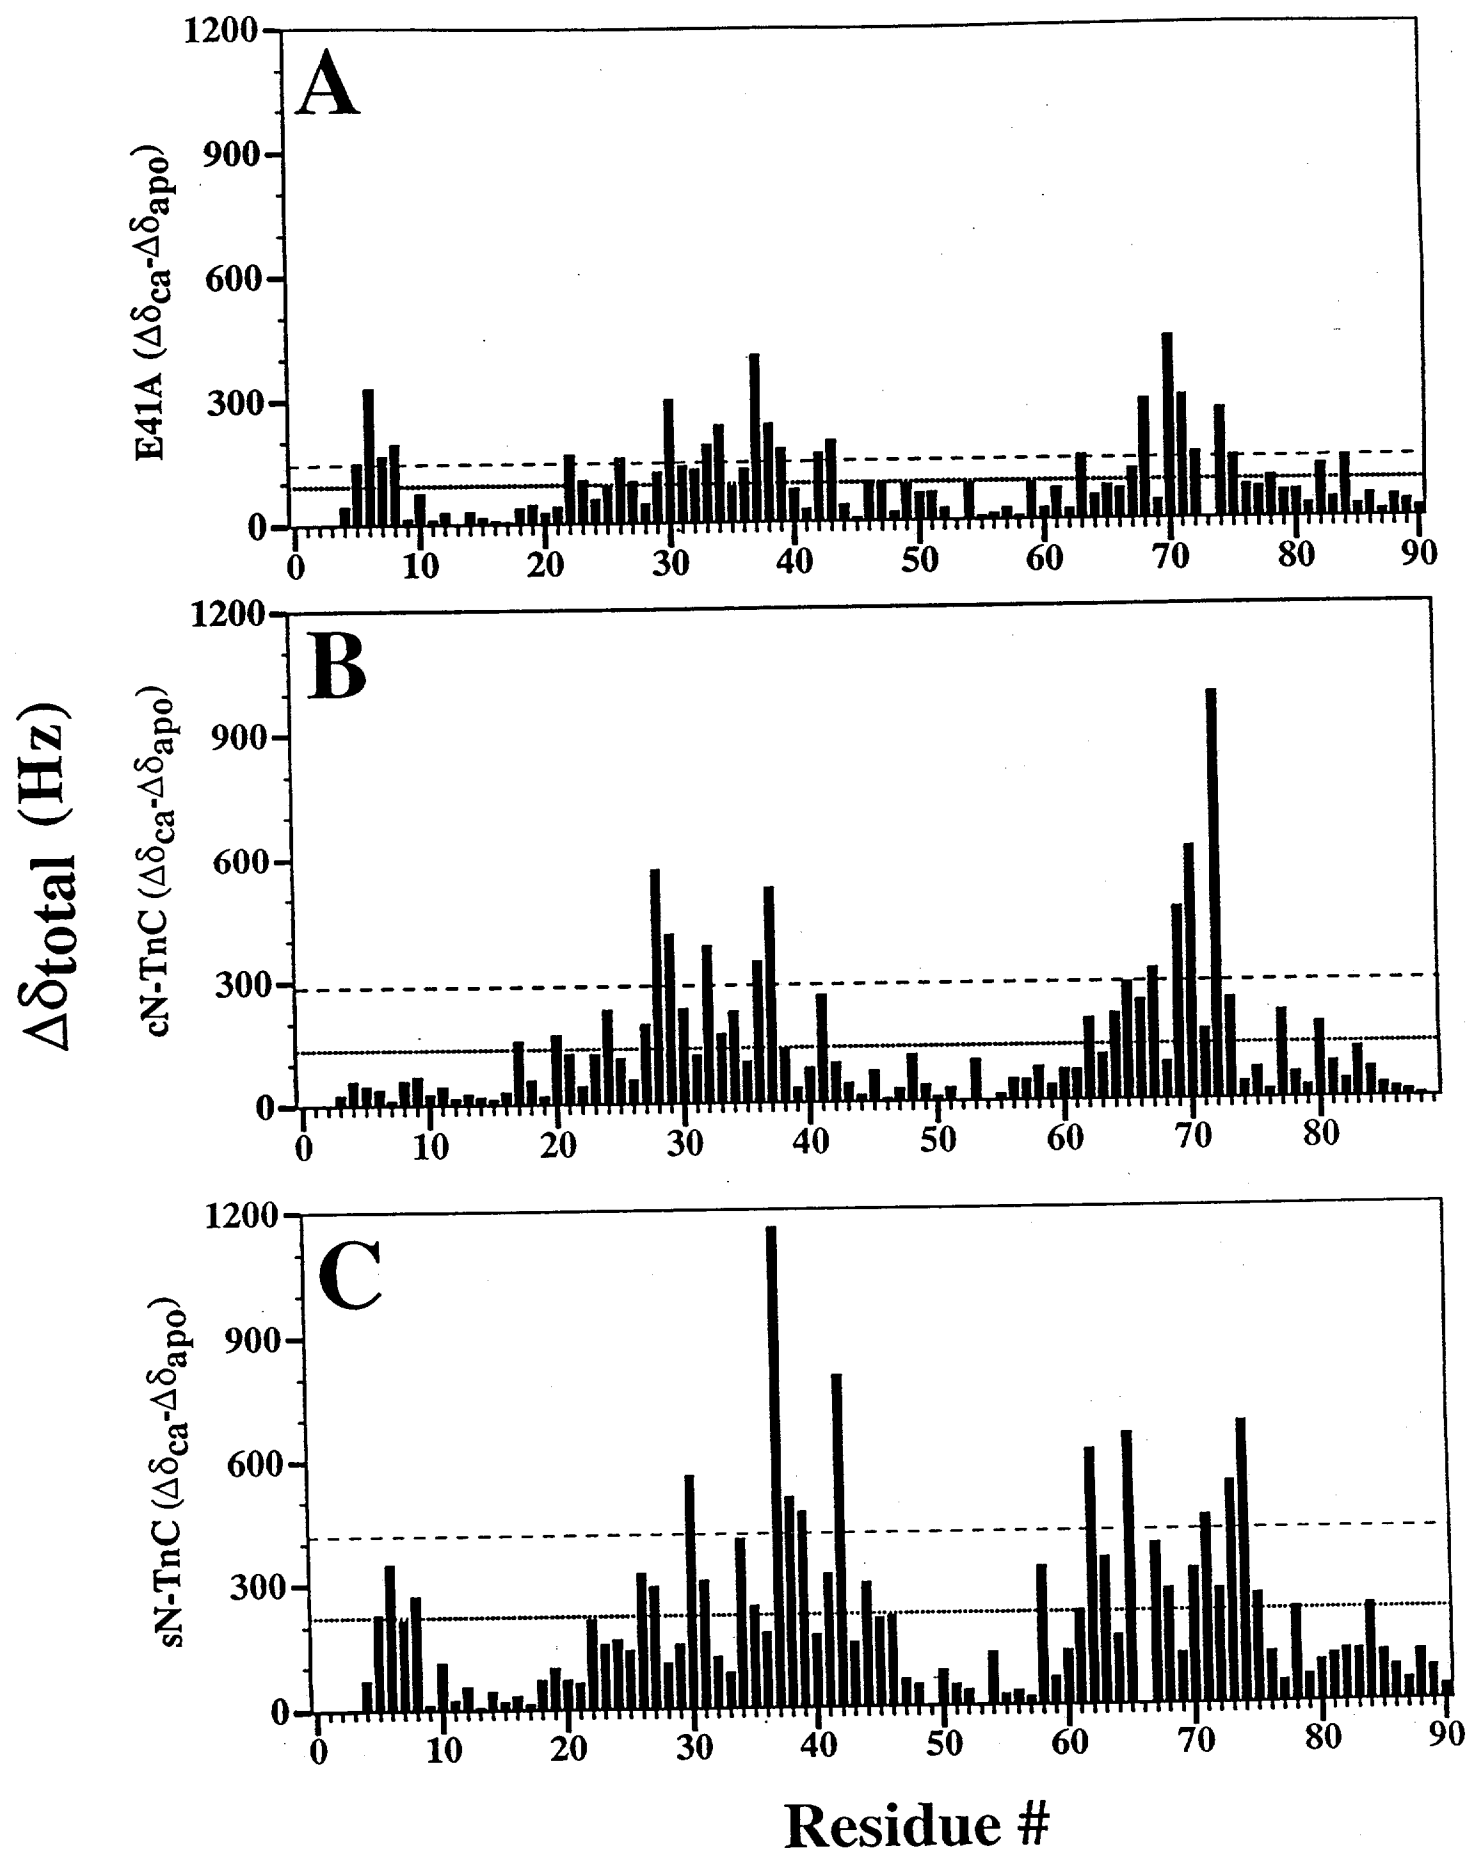

$\Delta\delta_{\text{total}}$  (Hz)

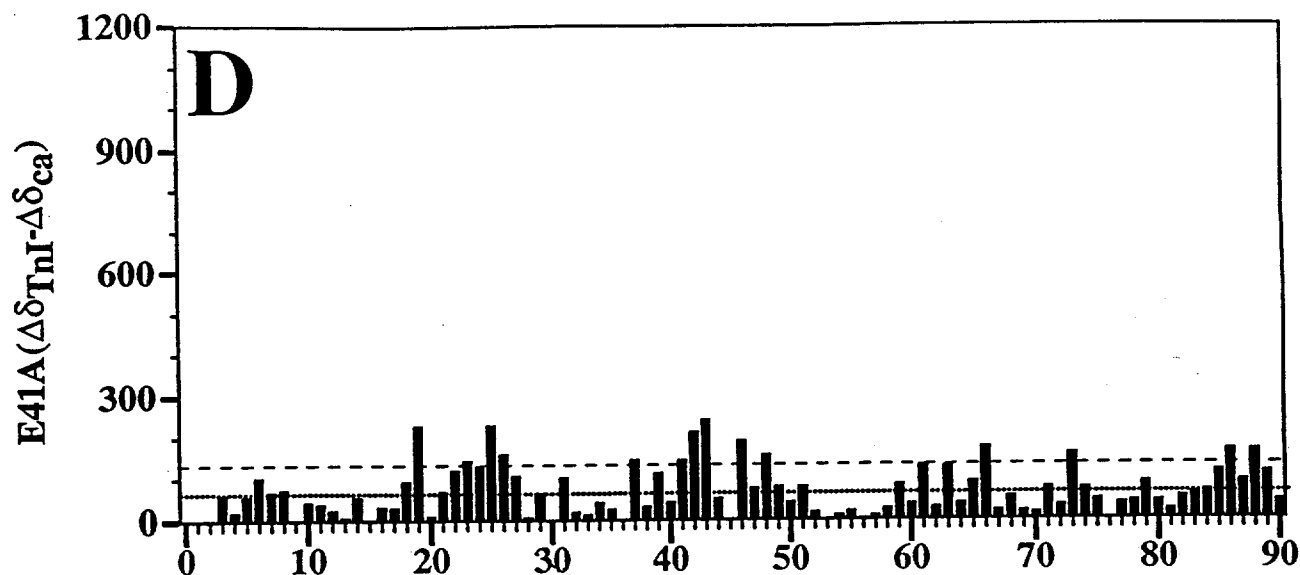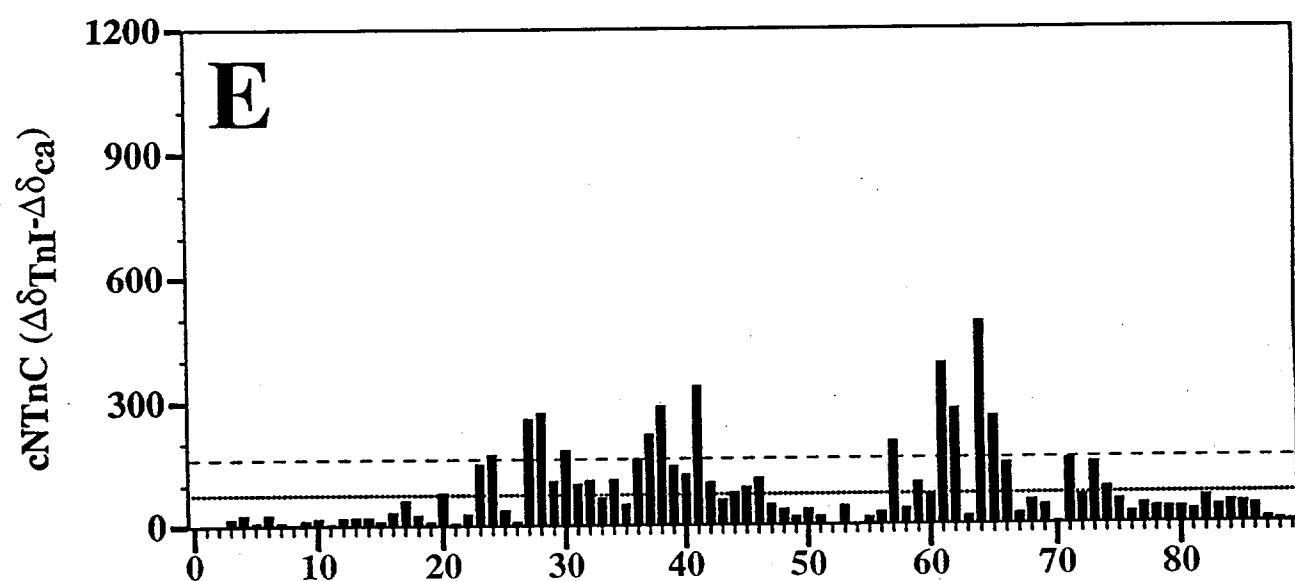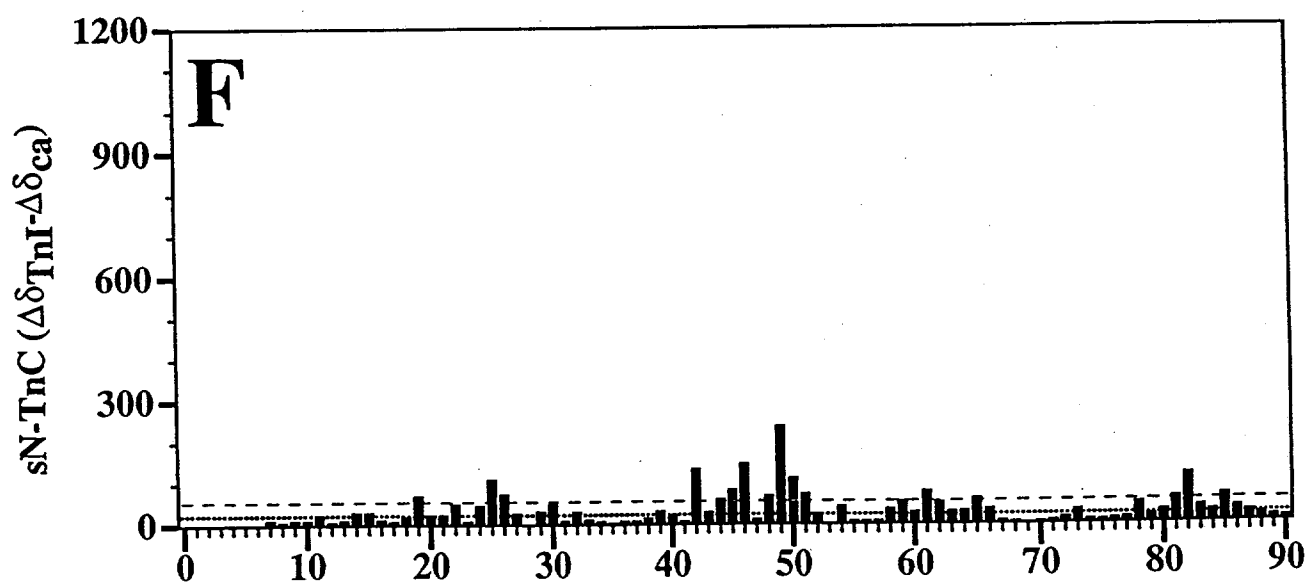

Supplement: Supplementary file 1 [file 5670486]
